# Supplementary figures and images for: Hemoglobin I from Lucina pectinata on Collagen Scaffold: A Prospective Hydrogen Sulfide Scavenger
Source: Hindawi journal article supplement (doi:10.1155/2022/5101712), 2022-05-04

UV-Vis

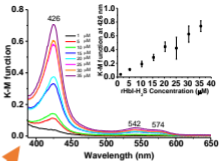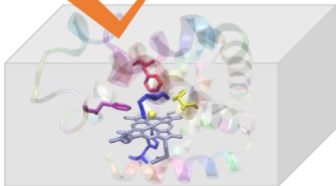

Supplement: f1 [file 5101712.f1.pdf]
